# Supplementary material for: A sensitive dual-signal electrochemiluminescence immunosensor based on Ru(bpy)32+@HKUST-1 and Ce2Sn2O7 for detecting the heart failure biomarker NT-proBNP
Source: Royal Society of Chemistry journal article supplement (doi:10.1039/d2tb02555h), 2023-01-01
Supplement: d2tb02555h1.pdf [file d2tb02555h1.pdf]

## Supporting Information

**A sensitive dual-signal electrochemiluminescence immunosensor based on  $\text{Ru}(\text{bpy})_3^{2+}$ @HKUST-1 and  $\text{Ce}_2\text{Sn}_2\text{O}_7$  for detecting heart failure biomarker NT-proBNP**

Yu Ji, Shuang He, Yang Chen\*, Pei Zhang, Jing Sun, Ya Li, Kaida Kuang, Nengqin Jia\*

The Education Ministry Key Lab of Resource Chemistry, Joint International Research Laboratory of Resource Chemistry, Ministry of Education, and Shanghai Key Laboratory of Rare Earth Functional Materials, College of Chemistry and Materials Science, Shanghai Normal University, Shanghai 200234, China.

\*Corresponding authors. E-mail: [nqjia@shnu.edu.cn](mailto:nqjia@shnu.edu.cn); [yangchen@shnu.edu.cn](mailto:yangchen@shnu.edu.cn)

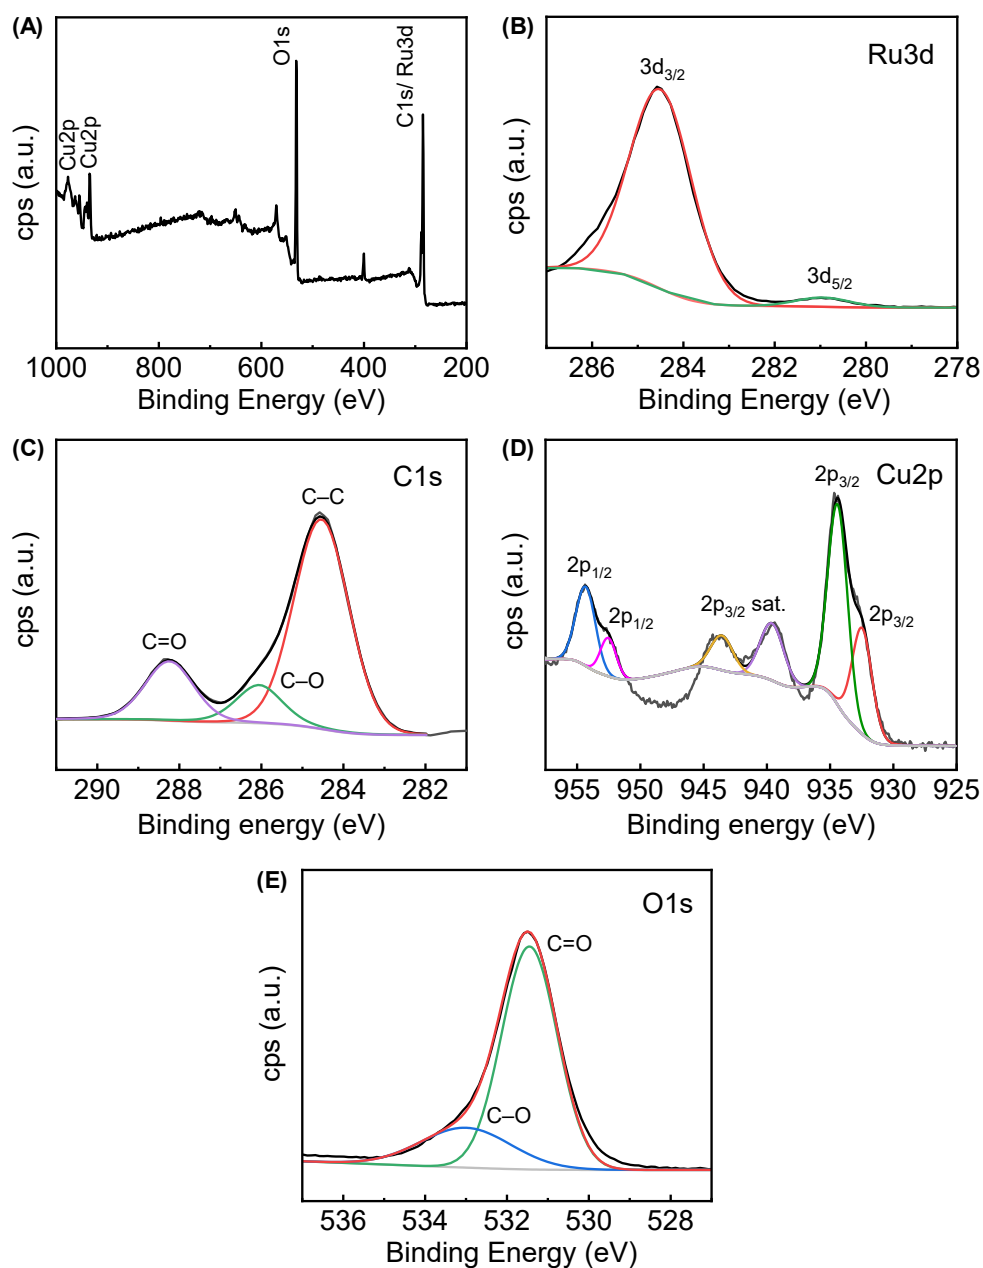

**Fig. S1** (A) XPS spectra of the Ru(bpy)<sub>3</sub><sup>2+</sup>@HKUST-1 composite and (B–E) the corresponding Ru3d, C1s, Cu2p and O1s core-level high-resolution spectra.

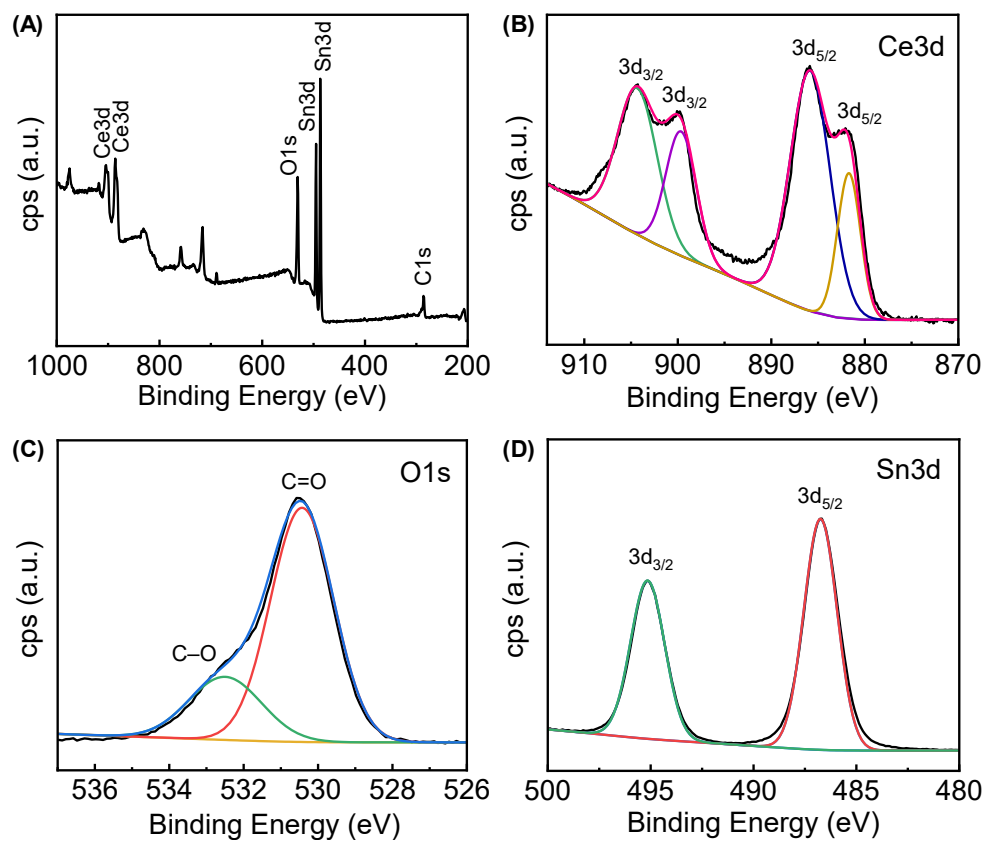

**Fig. S2** (A) XPS spectra of the  $\text{Ce}_2\text{Sn}_2\text{O}_7$  nanocubes and (B–D) the corresponding  $\text{Ce}3d$ ,  $\text{O}1s$  and  $\text{Sn}3d$  core-level high-resolution spectra.

**Table S1** The equivalent circuits fitting results of AC impedance spectra in Figure 3D.

| Electrode* | $R_s$ ( $\Omega$ ) | $R_{ct}$ ( $\Omega$ ) | $C_{dl}$ ( $\mu\text{F}$ ) | $Z_w$ ( $\Omega$ ) |
|------------|--------------------|-----------------------|----------------------------|--------------------|
| a          | 113.2 $\pm$ 1.1    | 130.4 $\pm$ 3.6       | 3.4 $\pm$ 0.6              | 260.5 $\pm$ 26.9   |
| b          | 111.9 $\pm$ 1.2    | 127.9 $\pm$ 5.5       | 24.4 $\pm$ 4.8             | 263.5 $\pm$ 24.2   |
| c          | 108.0 $\pm$ 1.3    | 150.4 $\pm$ 22.4      | 2.7 $\pm$ 0.8              | 664.4 $\pm$ 68.7   |
| d          | 103.5 $\pm$ 0.9    | 272.9 $\pm$ 5.0       | 2.3 $\pm$ 0.3              | 201.6 $\pm$ 33.0   |
| e          | 112.6 $\pm$ 1.1    | 401.1 $\pm$ 39.0      | 2.3 $\pm$ 0.4              | 1408 $\pm$ 119.9   |
| f          | 118.2 $\pm$ 1.1    | 629.2 $\pm$ 55.8      | 2.8 $\pm$ 0.3              | 850.2 $\pm$ 251.0  |

\*(a) bare GCE, (b) Ru(bpy)<sub>3</sub><sup>2+</sup>@HKUST-1/GCE, (c) Ab<sub>1</sub>/Ru(bpy)<sub>3</sub><sup>2+</sup>@HKUST-1/GCE, (d) BSA/Ab<sub>1</sub>/Ru(bpy)<sub>3</sub><sup>2+</sup>@HKUST-1/GCE, (e) NT-proBNP/BSA/Ab<sub>1</sub>/Ru(bpy)<sub>3</sub><sup>2+</sup>@HKUST-1/GCE, (f) Ce<sub>2</sub>Sn<sub>2</sub>O<sub>7</sub>-Ab<sub>2</sub>/NT-proBNP/BSA/Ab<sub>1</sub>/Ru(bpy)<sub>3</sub><sup>2+</sup>@HKUST-1/GCE.

**Table S2** Comparison on the NT-proBNP detection techniques.

| Methods           | Linear range (ng mL <sup>-1</sup> )   | Ref.      |
|-------------------|---------------------------------------|-----------|
| EC <sup>a</sup>   | 0.02–100                              | [1]       |
| SERS <sup>b</sup> | 1×10 <sup>-6</sup> –1                 | [2]       |
| PEC <sup>c</sup>  | 1×10 <sup>-4</sup> –50                | [3]       |
| ECL <sup>d</sup>  | 5×10 <sup>-4</sup> –20                | [4]       |
| ECL               | 1×10 <sup>-3</sup> –50                | [5]       |
| ECL               | 5×10 <sup>-4</sup> –1×10 <sup>4</sup> | This work |

<sup>a</sup>EC: electrochemistry. <sup>b</sup>SERS: surface-enhanced Raman spectroscopy. <sup>c</sup>PEC: photoelectrochemistry. <sup>d</sup>ECL: electrochemiluminescence.

**Note S1** Calculations on LOD and LOQ

To calculate the limit of detection (LOD) and limit of quantification (LOQ), an ECL measurement of ten parallel blank solutions was implemented. The mean calibration signal intensity of the blank ( $\Delta I_B$ ) is 4395 ( $\Delta I_B = 4255, 4420, 4425, 4467, 4355, 4180, 4361, 4323, 4648, 4515$ , respectively) with a standard deviation ( $S_B$ ) of 133.

Due to the negative linear relationship between calibration signal intensity ( $\Delta I_{ECL}$ ) and logarithm of NT-proBNP concentration (Figure 5C), the largest detectable calibration signal intensity ( $\Delta I_L$ ) and quantitative calibration signal intensity ( $\Delta I_Q$ ) are calculated as follows [6]:

$$\Delta I_L = \Delta I_B - 3S_B$$

$$\Delta I_Q = \Delta I_B - 10S_B$$

Therefore, by substituting  $\Delta I_L$  and  $\Delta I_Q$  into the standard calibration curve ( $\Delta I_{ECL} = -1468.04 \times \lg(C_{NT-proBNP}) + 88.03$ ), the LOD and LOQ of NT-proBNP are calculated to be  $2.2 \text{ pg mL}^{-1}$  and  $9.4 \text{ pg mL}^{-1}$ , respectively.

## References

- [1] Y. Zhuo, W.-J. Yi, W.-B. Lian, R. Yuan, Y.-Q. Chai, A. Chen, C.-M. Hu, Ultrasensitive electrochemical strategy for NT-proBNP detection with gold nanochains and horseradish peroxidase complex amplification, *Biosens. Bioelectron.* 2011, 26, 2188–2193.
- [2] X. Li, P. Lu, B. Wu, Y. Wang, H. Wang, B. Du, X. Pang, Q. Wei, Electrochemiluminescence quenching of luminol by CuS in situ grown on reduced graphene oxide for detection of N-terminal pro-brain natriuretic peptide, *Biosens. Bioelectron.* 2018, 112, 40–47.
- [3] Y. He, Y. Wang, X. Yang, S. Xie, R. Yuan, Y. Chai, Metal organic frameworks combining  $\text{CoFe}_2\text{O}_4$  magnetic nanoparticles as highly efficient SERS sensing platform for ultrasensitive detection of N-terminal pro-brain natriuretic peptide, *ACS Appl. Mater. Interfaces.* 2016, 8, 7683–7690.
- [4] Y. Zhang, R. Xu, Q. Kang, Y. Zhang, Q. Wei, Y. Wang, H. Ju, Ultrasensitive photoelectrochemical biosensing platform for detecting N-terminal pro-brain natriuretic peptide based on  $\text{SnO}_2/\text{SnS}_2/\text{mpg-C}_3\text{N}_4$  amplified by  $\text{PbS}/\text{SiO}_2$ , *ACS Appl. Mater. Interfaces.* 2018, 10, 31080–31087.
- [5] C. Wang, W. Zhu, T. Yan, L. Yang, X. Kuang, B. Du, X. Pang, Q. Wei, Novel electrochemiluminescent platform based on gold nanoparticles functionalized Ti doped BiOBr for ultrasensitive immunosensing of NT-proBNP, *Sens. Actuators B Chem.* 2018, 277, 401–407.
- [6] X. Shao, J. Luo, Z. Gong, X. Sun, H. Ma, D. Wu, D. Fan, Y. Li, Q. Wei, H. Ju, A quenching electrochemiluminescence immunosensor based on a novel  $\text{Ag}@\text{Ce}_2\text{Sn}_2\text{O}_7$  luminophore for the detection of neuron-specific enolase, *Sens. Actuators B Chem.* 2023, 374, 132810.
